# Supplementary material
Source: PubMed Central journal article supplement (PMC4823995)
Supplement: NIHMS771419-supplement-2.pdf [file NIHMS771419-supplement-2.pdf]

## Supplementary Materials

### Supplemental Table: Strains used in this study

All strains are isogenic to W1588-4C (a *RAD5* derivative of W303: *MATa ade2-1 can1-100 his3-11,15 leu2-3,112 trp1-1 ura3-1*). One strain is listed for each genotype, and two were used in experiments. Strain usage in each figure panel is indicated with “S”, standing for “Supplementary”.

| Strain       | Genotype                                                                                        | Used in Figures                       |
|--------------|-------------------------------------------------------------------------------------------------|---------------------------------------|
| X3544-4D     | <i>MATa HF-Smt3::LEU2</i>                                                                       | 1b                                    |
| T1834-1      | <i>MATa Mcm2-3HA::HIS3 HF-Smt3::LEU2</i>                                                        | 1b, 1c, 2b, S1a, S1b                  |
| T1839-1      | <i>MATa P<sub>ADHI</sub>-3HA-Mcm3::NatNT2 HF-Smt3::LEU2</i>                                     | 1b, 1c, 2b, S1a, S1b                  |
| T1840-1      | <i>MATa Mcm4-3HA::HIS3 HF-Smt3::LEU2</i>                                                        | 1b, 1c, 2b, S1a, S1b, S7b             |
| T1841-1      | <i>MATa Mcm5-3HA::HIS3 HF-Smt3::LEU2</i>                                                        | 1b, 1c, 2b, S1a, S1b                  |
| T1797-1      | <i>MATa Mcm6-3HA::HIS3 HF-Smt3::LEU2</i>                                                        | 1b, 1c, 2a, 2b, 3a, 3c, S1a, S1b, S2b |
| T1842-1      | <i>MATa Mcm7-3HA::HIS3 HF-Smt3::LEU2</i>                                                        | 1b, 1c, 2b, S1a, S1b                  |
| X6525-1c     | <i>MATa Mcm2-3HA::HIS3</i>                                                                      | 1b, S1b                               |
| X6223-2c     | <i>P<sub>ADHI</sub>-3HA-Mcm3::NatNT2</i>                                                        | 1b, S7f                               |
| X6526-3d     | <i>MATa Mcm4-3HA::HIS3</i>                                                                      | 1b, S1b                               |
| X6527-3a     | <i>Mcm5-3HA::HIS3</i>                                                                           | 1b                                    |
| X6528-7a     | <i>MATa Mcm6-3HA::HIS3</i>                                                                      | 1b, S1b                               |
| X6529-10d    | <i>Mcm7-3HA::HIS3</i>                                                                           | 1b, S7f                               |
| X6629-6c     | <i>MATa cdc6Δ::Gal-Cdc6::TRP1 bar1Δ::HphMX3 Mcm2-3HA::HIS3 HF-Smt3::LEU2</i>                    | 1d                                    |
| X6660-7b     | <i>MATa cdc6Δ::Gal-Cdc6::TRP1 bar1Δ::HphMX3 P<sub>ADHI</sub>-3HA-Mcm3::NatNT2 HF-Smt3::LEU2</i> | 1d                                    |
| X6628-8c     | <i>MATa cdc6Δ::Gal-Cdc6::TRP1 bar1Δ::HphMX3 Mcm4-3HA::HIS3 HF-Smt3::LEU2</i>                    | 1d                                    |
| X6659-14c    | <i>MATa cdc6Δ::Gal-Cdc6::TRP1 bar1Δ::HphMX3 Mcm5-Strep::HIS3 HF-Smt3::LEU2</i>                  | 1d                                    |
| X6630-8b     | <i>MATa cdc6Δ::Gal-Cdc6::TRP1 bar1Δ::HphMX3 Mcm6-3HA::HIS3 HF-Smt3::LEU2</i>                    | 1d, S2a                               |
| X6631-15d    | <i>MATa cdc6Δ::Gal-Cdc6::TRP1 bar1Δ::HphMX3 Mcm7-3HA::HIS3 HF-Smt3::LEU2</i>                    | 1d                                    |
| X6525-2d     | <i>MATa cdc7-4 Mcm2-3HA::HIS3 HF-Smt3::LEU2</i>                                                 | 3a                                    |
| X6623-3b     | <i>MATa cdc7-4 P<sub>ADHI</sub>-3HA-Mcm3::NatNT2 HF-Smt3::LEU2</i>                              | 3a                                    |
| X6526-5,6-6b | <i>MATa cdc7-4 Mcm4-3HA::HIS3 HF-Smt3::LEU2</i>                                                 | 3a, S2c                               |
| X6527-1c     | <i>MATa cdc7-4 Mcm5-3HA::HIS3 HF-Smt3::LEU2</i>                                                 | 3a                                    |
| X6528-7b     | <i>MATa cdc7-4 Mcm6-3HA::HIS3 HF-Smt3::LEU2</i>                                                 | 3a                                    |
| X6646-2c     | <i>MATa P<sub>sf2</sub>-3V5-IAA7::KAN GPD1-TIR::LEU2</i>                                        | 3b                                    |

|                |                                                                                                         |                        |
|----------------|---------------------------------------------------------------------------------------------------------|------------------------|
|                | <i>Mcm2-3HA::HIS3 HF-Smt3::LEU2</i>                                                                     |                        |
| X6622-9a       | <i>MATa Psf2-3V5-IAA7::KAN GPD1-TIR::LEU2</i><br><i>P<sub>ADHI</sub>-3HA-Mcm3::NatNT2 HF-Smt3::LEU2</i> | 3b                     |
| X6647-2,3-6b   | <i>MATa Psf2-3V5-IAA7::KAN GPD1-TIR::LEU2 Mcm4-3HA::HIS3 HF-Smt3::LEU2</i>                              | 3b, S2d, S2e           |
| X6648-11a      | <i>MATa Psf2-3V5-IAA7::KAN GPD1-TIR::LEU2 Mcm5-Strep::HIS3 HF-Smt3::LEU2</i>                            | 3b                     |
| T1874-1        | <i>MATa Psf2-3V5-IAA7::KAN GPD1-TIR::LEU2 Mcm6-3HA::HIS3 HF-Smt3::LEU2</i>                              | 3b, S2f                |
| X6576-15d      | <i>MATa GPD1-TIR::LEU2 Mcm6-3HA::HIS3 HF-Smt3::LEU2</i>                                                 | 3b, S2d, S2f           |
| X6696-1-16d    | <i>MATa dbf4-4A::HIS3 sld3-A-10his-13myc::KAN Mcm6-3HA::HIS3 HF-Smt3::LEU2</i>                          | 3c                     |
| T1462-1a       | <i>MATa Mcm6-3V5-SuOn::KAN</i>                                                                          | 4a, 4b, 7a, S4a, S4d   |
| T1464-7d       | <i>MATa Mcm6-3V5-ctrl::KAN</i>                                                                          | 4a, 4b, 7a, S4a        |
| X6661-1d       | <i>MATa cdc6Δ::Gal-Cdc6::TRP1 bar1Δ::HphMX3 Mcm6-3V5-SuOn::KAN HF-Smt3::LEU2</i>                        | 4c                     |
| X6662-13b      | <i>MATa cdc6Δ::Gal-Cdc6::TRP1 bar1Δ::HphMX3 Mcm6-3V5-ctrl::KAN HF-Smt3::LEU2</i>                        | 4c                     |
| T1462-2        | <i>Mcm6-3V5-SuOn::KAN/+</i>                                                                             | 4d                     |
| T1464-2        | <i>Mcm6-3V5-ctrl::KAN/+</i>                                                                             | 4d                     |
| X6714          | <i>Mcm6-3V5-SuOn::KAN/+ ubc9-10::NAT/+</i>                                                              | 4e                     |
| X6898-i1       | <i>cdc7-4/cdc7-4 Mcm6-3V5-SuOn::KAN/Mcm6-IAA17-3flag::HIS3 ADH1-TIR-9myc::URA3/+</i>                    | 5a, 5b, 5c, 5d, 5e, 6a |
| X6899-i3       | <i>cdc7-4/cdc7-4 Mcm6-3V5-ctrl::KAN/Mcm6-IAA17-3flag::HIS3 ADH1-TIR-9myc::URA3/+</i>                    | 5a, 5b, 5c, 5d, 5e, 6a |
| X6636-9c       | <i>MATa Mcm6-3V5-ctrl::KAN Mcm4-3HA::HIS3</i>                                                           | 6b, S3e, S6d           |
| X6637-4d       | <i>MATa Mcm6-3V5-SuOn::KAN Mcm4-3HA::HIS3</i>                                                           | 6b, S3e, S4d           |
| X6619-12d      | <i>MATa Mcm6-3V5-SuOn ::KAN Mcm4-3HA::HIS3 rif1Δ::URA3</i>                                              | 6b                     |
| X6617          | <i>Mcm6-3V5-SuOn::KAN/+ rif1Δ::URA3/+</i>                                                               | 7a                     |
| X3186-10b      | <i>MATa rif1Δ::URA3</i>                                                                                 | 7a                     |
| X6617_2-3,4-2c | <i>rif1Δ::URA3 Mcm6-3V5-SuOn::KAN</i>                                                                   | 7a, S4d                |
| X6618-8b       | <i>rif1Δ::URA3 Mcm6-3V5-ctrl::KAN</i>                                                                   | 7a                     |
| X6779-1-5b     | <i>MATa Glc7-13myc::HIS3 Rif1-Flag::KAN</i>                                                             | 7b, S6e, S6f           |
| X6780-2-15a    | <i>MATa Glc7-13myc::HIS3 Rif1-Flag::KAN Mcm6-3V5-ctrl::KAN</i>                                          | 7b, S6e                |
| X6779-1-7b     | <i>MATa Glc7-13myc::HIS3 Rif1-Flag::KAN Mcm6-3V5-SuOn::KAN</i>                                          | 7b, S6e, S6f           |
| X7028-1a       | <i>Mcm2-3HA::HIS3 8his-Smt3::TRP1</i>                                                                   | S1a                    |
| X7029-4c       | <i>MATa P<sub>ADHI</sub>-3HA-Mcm3::NatNT2 8his-Smt3::TRP1</i>                                           | S1a                    |
| X7030-9d       | <i>Mcm4-3HA::HIS3 8his-Smt3::TRP1</i>                                                                   | S1a                    |
| X7031-2c       | <i>Mcm5-3HA::HIS3 8his-Smt3::TRP1</i>                                                                   | S1a                    |
| X7032-2c       | <i>Mcm6-3HA::HIS3 8his-Smt3::TRP1</i>                                                                   | S1a                    |
| X7033-1c       | <i>Mcm7-3HA::HIS3 8his-Smt3::TRP1</i>                                                                   | S1a                    |
| X7069-1a       | <i>MATa P<sub>ADHI</sub>-3HA-Mcm3::NatNT2</i>                                                           | S1b                    |
| X6527-5a       | <i>MATa Mcm5-3HA::HIS3</i>                                                                              | S1b                    |
| X6529-12d      | <i>MATa Mcm7-3HA::HIS3</i>                                                                              | S1b                    |
| X5752-9c       | <i>Mcm6-3V5-SuOn::KAN</i>                                                                               | S3b, S3c               |
| X5752-9a       | <i>Mcm6-3V5-SuOn::KAN HF-Smt3::LEU2</i>                                                                 | S3b, S3c               |
| X6334-1c       | <i>MATa Mcm2-3HA::HIS3 HF-Smt3::LEU2 Mcm6-3V5-ctrl::KAN</i>                                             | S3d                    |

|             |                                                                                |                      |
|-------------|--------------------------------------------------------------------------------|----------------------|
| X6327-3b    | <i>MATa Mcm2-3HA::HIS3 HF-Smt3::LEU2 Mcm6-3V5-SuOn::KAN</i>                    | <i>S3d</i>           |
| X6969-17a   | <i>MATa P<sub>ADHI</sub>-3HA-Mcm3::NatNT2 HF-Smt3::LEU2 Mcm6-3V5-ctrl::KAN</i> | <i>S3d</i>           |
| X6968-8b    | <i>MATa P<sub>ADHI</sub>-3HA-Mcm3::NatNT2 HF-Smt3::LEU2 Mcm6-3V5-SuOn::KAN</i> | <i>S3d</i>           |
| X6970-2a    | <i>MATa Mcm4-3HA::HIS3 HF-Smt3::LEU2 Mcm6-3V5-ctrl::KAN</i>                    | <i>S3d</i>           |
| X6329-19a   | <i>MATa Mcm4-3HA::HIS3 HF-Smt3::LEU2 Mcm6-3V5-SuOn::KAN</i>                    | <i>S3d</i>           |
| X6974-1a    | <i>MATa Mcm7-3HA::HIS3 HF-Smt3::LEU2 Mcm6-3V5-ctrl::KAN</i>                    | <i>S3d</i>           |
| X6973-5c    | <i>MATa Mcm7-3HA::HIS3 HF-Smt3::LEU2 Mcm6-3V5-SuOn::KAN</i>                    | <i>S3d</i>           |
| X6258-6a    | <i>Pol12-TAP::HIS3 HF-Smt3::LEU2</i>                                           | <i>S3f</i>           |
| X6258-10b   | <i>Pol12-TAP::HIS3 Mcm6-3V5-SuOn::KAN HF-Smt3::LEU2</i>                        | <i>S3f</i>           |
| X6259-10b   | <i>Pol32-TAP::HIS3 HF-Smt3::LEU2</i>                                           | <i>S3f</i>           |
| X6259-12d   | <i>Pol32-TAP::HIS3 Mcm6-3V5-SuOn::KAN HF-Smt3::LEU2</i>                        | <i>S3f</i>           |
| X6260-10b   | <i>Rfc1-TAP::HIS3 HF-Smt3::LEU2</i>                                            | <i>S3f</i>           |
| X6260-10a   | <i>Rfc1-TAP::HIS3 Mcm6-3V5-SuOn::KAN HF-Smt3::LEU2</i>                         | <i>S3f</i>           |
| X6262-10b   | <i>Rfc3-TAP::HIS3 HF-Smt3::LEU2</i>                                            | <i>S3f</i>           |
| X6262-7d    | <i>Rfc3-TAP::HIS3 Mcm6-3V5-SuOn::KAN HF-Smt3::LEU2</i>                         | <i>S3f</i>           |
| X6263-1c    | <i>Pri1-TAP::HIS3 HF-Smt3::LEU2</i>                                            | <i>S3f</i>           |
| X6263-1d    | <i>Pri1-TAP::HIS3 Mcm6-3V5-SuOn::KAN HF-Smt3::LEU2</i>                         | <i>S3f</i>           |
| X6999       | <i>mcm4Δ2-174/+ Mcm6-3V5-ctrl::KAN/+</i>                                       | <i>S4b</i>           |
| G957        | <i>MATa mcm5-bob1</i>                                                          | <i>S4c, S4d</i>      |
| X6100-1b    | <i>MATa cdc7-4</i>                                                             | <i>S4c</i>           |
| X6977-4a    | <i>cdc7-4 rif1Δ::URA3</i>                                                      | <i>S4c</i>           |
| X6815-4b    | <i>cdc7-4 mcm5-bob1</i>                                                        | <i>S4c</i>           |
| X6978-15b   | <i>mcm5-bob1 Mcm6-3V5-SuOn::KAN</i>                                            | <i>S4d</i>           |
| X6528-18b   | <i>MATa Mcm6-3HA::HIS3</i>                                                     | <i>S6a, S6b, S6c</i> |
| T1679-4-17b | <i>MATa Mcm6-SUMO-3HA::KAN</i>                                                 | <i>S6a, S6b, S6c</i> |
| X6966-2d    | <i>MATa Mcm4-3HA::HIS3 Mcm6-3V5-ctrl::KAN rif1Δ::URA3</i>                      | <i>S6d</i>           |
| X6967-3d    | <i>MATa Glc7-13myc::HIS3 rif1Δ::URA3</i>                                       | <i>S6f</i>           |
| X6804-12d   | <i>MATa Glc7-13myc::HIS3 rif1Δ::URA3 Mcm6-3V5-SuOn::KAN</i>                    | <i>S6f</i>           |
| X6975-10b   | <i>MATa Mcm2-3HA::HIS3 HF-Smt3::LEU2</i>                                       | <i>S7a</i>           |
| X6975-2b    | <i>MATa rif1Δ::URA3 Mcm2-3HA::HIS3 HF-Smt3::LEU2</i>                           | <i>S7a</i>           |
| X6976-1a    | <i>MATa Mcm6-3HA::HIS3 HF-Smt3::LEU2</i>                                       | <i>S7a</i>           |
| X6976-8b    | <i>MATa rif1Δ::URA3 Mcm6-3HA::HIS3 HF-Smt3::LEU2</i>                           | <i>S7a</i>           |
| X6811-18d   | <i>MATa Ulp2-3V5-IAA7::KAN GPD1-TIR::LEU2 Mcm4-3HA::HIS3 8his-Smt3::TRP1</i>   | <i>S7c, S7e</i>      |
| X6812-2b    | <i>MATa Ulp2-3V5-IAA7::KAN GPD1-TIR::LEU2 Mcm6-3HA::HIS3 8his-Smt3::TRP1</i>   | <i>S7c, S7e</i>      |
| X6814-2b    | <i>MATa Ulp1-3V5-IAA7::KAN GPD1-TIR::LEU2 Mcm6-3HA::HIS3 8his-Smt3::TRP1</i>   | <i>S7d</i>           |
